# Supplementary material for: Psychosocial effects of adverse pregnancy outcomes and their influence on reporting pregnancy loss during surveys and surveillance: narratives from Uganda
Source: PubMed Central journal article supplement (PMC10439567; doi:10.1186/s12889-023-16519-5), 2023-08-18
Supplement: 12889_2023_16519_MOESM2_ESM.pdf [file 12889_2023_16519_MOESM2_ESM.pdf]

**Additional File 2: Ethical approval for EN-INDEPTH study from local institutional review boards**

| <b>Site</b>            | <b>Institutional Review Boards</b>                                                      | <b>Date</b>     | <b>Number/Ref</b>   |
|------------------------|-----------------------------------------------------------------------------------------|-----------------|---------------------|
| Bandim (Guinea-Bissau) | Comité Nacional de Ética na Saúde                                                       | 12 June 2017    | 072/CNES/INASA/2017 |
| Dabat (Ethiopia)       | Institutional Review Board, University of Gondar                                        | 19 April 2017   | VP/RCS/05/1074/2016 |
| IgangaMayuge (Uganda)  | Mildmay Uganda Research Ethics Committee                                                | 26 June 2017    | REC REF 0305-2017   |
|                        | Uganda National Council of Science and Technology                                       | 11 October 2017 | SS 4244             |
| Kintampo (Ghana)       | Kintampo Health Research Centre, Ghana Health service Scientific Review Committee (SRC) | 14 June 2017    | SRC/130617          |
|                        | Ghana Health Services Ethics Review Committee                                           | 26 July 2017    | GHS-ERC:19/06/14    |
|                        | Kintampo Health Research Centre Institutional Ethics Committee                          | 9 August 2017   | KHRCIEC/2017-14     |

|                                                                        |                                                 |              |          |
|------------------------------------------------------------------------|-------------------------------------------------|--------------|----------|
| Matlab<br>(Bangladesh)                                                 | lcddr,b Ethical Review<br>Committee             | 19 July 2017 | PR-17049 |
| London School of<br>Hygiene & Tropical<br>Medicine (United<br>Kingdom) | London School of Hygiene<br>& Tropical Medicine | 24 May 2017  | 12218    |
